# Designing fecal microbiota transplant trials that account for differences in donor stool efficacy

Scott W. Olesen<sup>1,\*</sup>, Thomas Gurry<sup>1,2,\*</sup>, Eric J. Alm<sup>1,2,3,†</sup>

**1** Department of Biological Engineering, Massachusetts Institute of Technology, Cambridge, MA, USA

**2** Center for Microbiome Informatics and Therapeutics, Massachusetts Institute of Technology, Cambridge, MA, USA

**3** The Broad Institute of MIT and Harvard, Cambridge, MA, USA

\* These authors contributed equally to this work. † [ejalm@mit.edu](mailto:ejalm@mit.edu)

## Abstract

Fecal microbiota transplantation (FMT) is a highly effective intervention for patients suffering from recurrent *Clostridium difficile*, a common hospital-acquired infection. FMT's success as a therapy for *C. difficile* has inspired interest in performing clinical trials that experiment with FMT as a therapy for treating conditions like inflammatory bowel disease, obesity, diabetes, and Parkinson's disease. Results from clinical trials that use FMT to treat inflammatory bowel disease suggest that, for at least one condition beyond *C. difficile*, most FMT donors produce stool that is not efficacious. The optimal strategies for identifying and using efficacious donors have not been investigated. We therefore formulated an optimal Bayesian response-adaptive donor selection strategy and a computationally-tractable myopic heuristic. This algorithm computes the probability that a donor is efficacious by updating prior expectations about the efficacy of FMT, the placebo rate, and the fraction of donors that are efficacious. In simulations designed to mimic a recent FMT clinical trial, for which traditional power calculations predict  $\sim 100\%$  statistical power, we found that accounting for differences in donor efficacy reduced the predicted statistical power to  $\sim 9\%$ . For these simulations, using the Bayesian allocation strategy more than quadrupled the statistical power to  $\sim 39\%$ . We use the results of similar simulations to make recommendations about the number of patients, number of donors, and choice

of clinical endpoint that clinical trials should use to optimize their ability to detect if FMT is effective for  
treating a condition.

## Author Summary

Many clinical trials test the ability of a drug to treat a disease by comparing that drug against a placebo. In fecal microbiota transplant (FMT) trials, the “drug” is stool taken from a donor. For some diseases, however, the outcome of FMT seems to depend strongly on the choice of donor, suggesting that different donors may be producing different “drugs”. Standard clinical trials are not designed to account for this possible multiplicity of drugs. We translated data from a FMT clinical trial into a model of donor stool efficacy and used this model to evaluate how different trial designs can affect a trial’s ability to measure FMT’s effectiveness. We found that, if only some donors produce efficacious drugs, standard clinical trial designs are likely to conclude that FMT is ineffective, thus denying patients an efficacious therapy. We also show that donor allocation strategies that adaptively use the best-performing donors can dramatically improve a trial’s performance. Because FMT is not well enough understood for researchers to *a priori* identify efficacious stool, our approach makes no assumptions about the biology of the condition being treated.

## Introduction

Fecal microbiota transplant (FMT), the transfer of stool from a healthy person into an ill person’s gut, is a highly effective treatment for recurrent *Clostridium difficile* infections, which kill 30,000 Americans a year. Despite FMT’s efficacy and increasingly widespread use, the biological mechanism by which FMT cures the infection is not fully understood [1, 2, 3, 4, 5, 6, 7]. FMT’s success in treating *C. difficile* has generated interest in experiments to use FMT to treat other conditions related to the gut and the gut-associated microbiota [8, 9]. However, emerging evidence suggests using FMT for these other diseases will be more challenging. Notably, in a recent study by Moayyedi *et al.* [10] that used FMT to treat ulcerative colitis, patients appeared to respond to stool from only one of the six stool donors. Stool from all other donors was no more efficacious than placebo. These results suggest that the effectiveness of FMT can depend strongly on the choice of stool donor.

Ideally, information collected before or during a clinical trial could be used to identify which donors are efficacious. Predictions about a donor’s efficacy could be repeatedly updated depending on that donor’s performance, the performance of other donors, and prior expectations about donor efficacy and heterogeneity.

There is, however, not enough clinical information about this variability or biological information about the mechanism by which FMT treats disease to create or validate a model for any particular indication. We therefore present a general model of differences in donor stool efficacy that is not specific for any clinical indication or biomarker. Using this model, we formulate an optimal, adaptive, Bayesian algorithm for allocating donors. We also formulate a computationally-tractable myopic Bayesian allocation heuristic.

Using simulations of clinical trials, we show that differences in donor efficacy and the trial's strategy for allocating donors can have substantial impacts on the trial's statistical power. We compare the performance of non-adaptive approaches to matching patients and donors against a variation of a previously-studied adaptive algorithm (a variation of the "play the winner" strategy [11, 12, 13]) and our own Bayesian heuristic. We find that, in many cases, traditional non-adaptive donor allocation strategies are likely to falsely conclude that FMT is inefficacious. Adaptive strategies, however, can substantially increase a trial's ability to detect if FMT is efficacious.

## Methods

### Model of differences in donor stool efficacy

The results of the trial reported in in Moayyedi *et al.* [10] raise the possibility that only some donors produce stool that is efficacious for treating ulcerative colitis. We developed a simple model of differences in the efficacy of stool produced by different donors (Fig. 1). The model we present assumes:

- Each donor produces efficacious stool or inefficacious stool. Stool from inefficacious donors is inert and has no effect beyond placebo.
- All patients receive one course of treatment, each from one donor. Multiple patients can receive stool from the same donor, but each patient receives stool from only one donor.
- Patient responses are dichotomous: a patient either responds to treatment (i.e., reaches a positive clinical endpoint) or not.
- Patients are exchangeable.

These assumptions mean that the model has only three parameters:

1. the placebo rate  $p_{\text{placebo}}$ ,
2. the probability  $p_{\text{eff}}$  that a patient will respond to stool from an efficacious donor, and

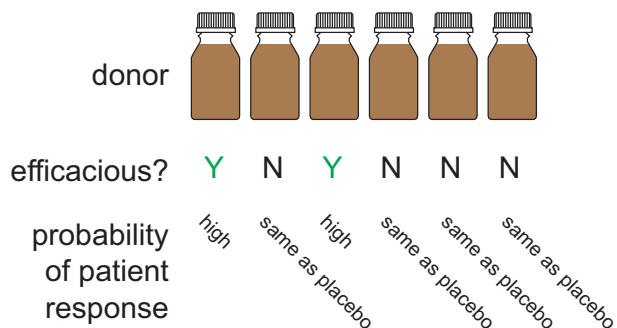

Figure 1: The model of differences in donor efficacy. In the model, donors are efficacious or not. Patients respond to FMT from an efficacious stool donor with probability  $p_{\text{eff}}$ . An FMT from an inefficacious stool donor is considered identical to a placebo, i.e., patients respond with probability  $p_{\text{placebo}}$ . The fraction of donors in the general donor population that are efficacious is  $f_{\text{eff}}$ .

| Relevant trial result                                              | Parameter            | Estimated value |
|--------------------------------------------------------------------|----------------------|-----------------|
| 2 of 37 patients in placebo arm achieve remission                  | $p_{\text{placebo}}$ | $2/37 = 0.054$  |
| 1 of 6 donors appeared efficacious                                 | $f_{\text{eff}}$     | $1/6 = 0.17$    |
| 7 of 18 patients allocated to efficacious donor achieved remission | $p_{\text{eff}}$     | $7/18 = 0.39$   |

Table 1: Estimates of model parameters from the data from an ulcerative colitis clinical trial. These clinical data are drawn from the results of the trial reported in Moayyedi *et al.* [10], which used FMT to treat ulcerative colitis.

3. the frequency  $f_{\text{eff}}$  of efficacious donors among the general donor population. 71

These parameters can be easily related to results from clinical trials. A conversion between the clinical trial results from Moayyedi *et al.* [10] and the parameters in the model are shown in Table 1. 72  
73

Further details about the model, its extensibility, and techniques for drawing random variates of its parameters are in the SI Text. 74  
75

## Donor allocation strategies 76

In simulations of clinical trials, four different strategies for choosing which donor to use with which patient were evaluated. The first two strategies, block allocation and random allocation, are non-adaptive, that is, the allocation decisions about which donor will be used for which patient can be made before the trial begins. The other two strategies, a randomized urn-based strategy and a myopic Bayesian strategy, are response-adaptive strategies, that is, the allocation about which donor to use for a patient will depend on outcomes of previous patients (Fig. 2). 77  
78  
79  
80  
81  
82

## Block & random assignment (non-adaptive)

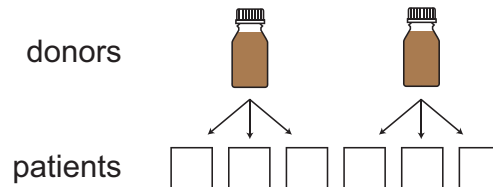

## Urn-based & Bayesian assignment (adaptive)

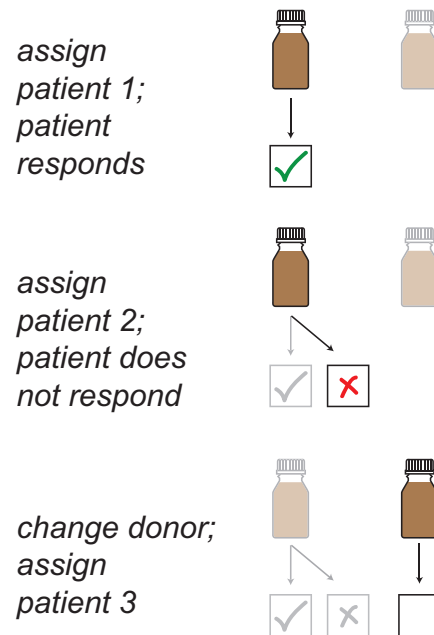

Figure 2: Adaptive donor allocations change depending on the trial's progress. In a non-adaptive allocation, the patients and donors can be matched before any patient is treated. In an adaptive allocation, the outcome of previous patients' treatments can affect the allocation of future patients. For example, if a donor is used for a patient who responds to treatment, that donor might be used again. If the patient does not respond, a different donor might be used.

**Block allocation** In a block allocation, patients are evenly allocated to donors. For example, if there are 30 patients and 6 donors, the first 5 patients are treated with the first donor, the second 5 patients are treated with the second donor, etc. (In clinical practice, patients would be randomized within the blocks.)

**Random allocation** In a random allocation, patients are allocated to donors at random. (On average, random allocations are similar to block allocations, so these two types of non-adaptive simulation yield similar results.)

**Urn-based allocation** Our urn-based allocation strategy is a variation on the “play-the-winner” strategies designed and studied as an ethical [14] and statistically-rigorous way to decide how to allocate patients to a treatment arm when a trial includes more than one treatment arm [15, 16, 17]. In this study, we used the generalized Pólya’s urn [18] with parameters  $w = 1$ ,  $\alpha = 3$ ,  $\beta = 0$ , and without replacing the drawn ball.

Adaptive allocation strategies, like this urn-based approach, are designed to reduce the probability of a Type II error (i.e., to avoid concluding that FMT is ineffective when it actually is effective) without increasing the probability of a Type I error (i.e., without increasing the chance that a trial will conclude that FMT is effective when it is actually ineffective). If FMT is effective for some donors, this urn-based allocation should allocate more patients to efficacious donors. If FMT is ineffective (i.e., there are no efficacious donors), then an adaptive strategy should not increase the risk of a Type I error, since any and all allocation strategies will allocate only inefficacious donors.

**Myopic Bayesian strategy** The urn-based approach is randomized, which is desirable in clinical trials because it can reduce certain kinds of bias [11]. However, random approaches are not guaranteed to make the best choices about donor allocation. We therefore designed a myopic Bayesian deterministic donor allocation strategy that uses the results collected during a simulated trial to make the best choice about how to allocate the next patient, similar to other “bandit” problems [19]. Unless noted, the myopic Bayesian strategy was initialized with a uniform prior on the model parameters.

Computing the posterior predictive probabilities in the myopic Bayesian allocation strategy requires a computationally-intensive numerical integration. The value of the integral was computed using Monte Carlo integration with Suave (SUBregion-Adaptive VEGas), an importance sampling method combined with a globally adaptive subdivision strategy. Sampling for this integral was performed with Sobol pseudo-random numbers. The integrator was implemented in C++ using the Cuba package [20]. Wrappers for the integration routine were implemented in Python 3 and simulations were then parallelized to run on multiple cores to

optimize computational run time [21].

Details about the optimal Bayesian strategy and the derivation of the posterior predictive probabilities are in the SI Text.

## Simulated clinical trials

The expected fraction of patients allocated to efficacious donors and the the statistical power of clinical trials using different donor allocation strategies were estimated using simulated clinical trials. In each simulation, the three model parameters ( $p_{\text{placebo}}$ ,  $p_{\text{eff}}$ ,  $f_{\text{eff}}$ ) and the number of patients in the trial were fixed. For each combination of the trial parameters, 10,000 lists of 6 donors each were randomly generated. Donors were designated as efficacious or not efficacious by random chance according to the frequency of efficacious donors  $f_{\text{eff}}$ . The same donor lists were used for simulations for each of the allocation strategies.

In one set of simulations, the number of donors was varied among 1, 3, 5, 10, 15, and 30 donors. For those simulations, lists of 30 donors were generated for each parameter set and trial iteration. The lists were truncated for the simulations using less than 30 donors.

For each allocation strategy and donor list, a trial was simulated. In each simulation, a patient allocated to an efficacious donor responds to the treatment with probability  $p_{\text{eff}}$ . Patients allocated to inefficacious donors or to the placebo arm respond with probability  $p_{\text{placebo}}$ . For adaptive allocations, the outcomes from all the previous patients treatment were determined before the donor for the next patient was selected. An equal number of patients was allocated to the treatment and placebo arms.

**Clinically-relevant parameter values** Simulations were performed for all combinations of parameter values selected to reflect clinically-relevant possibilities:

- The placebo rate  $p_{\text{placebo}}$  is either 0.05 (a low placebo rate consistent with stringent, objective outcomes; e.g., endoscopic Mayo score [10, 22]) or 0.25 (a high placebo rate consistent with self-reported, subjective outcomes [23, 24]).
- The efficacy  $p_{\text{eff}}$  of efficacious donors is either 0.4 (similar to the value in Table 1) or 0.95 (efficacy of FMT to treat *C. difficile* infection).
- The frequency  $f_{\text{eff}}$  of efficacious donors is either 0.15 (similar to the value in Table 1) or 0.9 (reflective of the fact that almost any well-screened donor produces stool that can successfully treat *C. difficile* infection).

- The number of patients in each of the treatment and control arms is 15, 30, or 60, corresponding to a range of patient numbers typical for Phase I and small Phase II clinical trials.

Of these combinations, the set of values most similar to the one in Table 1 is  $p_{\text{placebo}} = 0.05$ ,  $p_{\text{eff}} = 0.4$ ,  $f_{\text{eff}} = 0.15$ ,  $N_{\text{patients}} = 30$ .

**Computing statistical power** After determining the outcome of all the patients in the trial, the  $p$ -value of a one-sided Fisher’s exact test (asserting that the response rate in the treatment arm was greater) was calculated. The proportion of simulations that produced  $p < 0.05$  was the estimate of the statistical power for that allocation strategy under those trial parameters. Confidence intervals were calculated using the method of Clopper and Pearson [25]. Values are rounded to two or three significant digits.

## Results

### **Trials using adaptive strategies allocate more patients to efficacious donors**

The purpose of adaptive donor allocation strategies is to identify and use efficacious donors. We therefore expected that simulated trials that use adaptive strategies would allocate more patients to efficacious donors (compared to simulated trials that used the block or random donor allocation strategies).

For every parameter set simulated, the average fraction of patients allocated to efficacious donors was greater in the adaptive strategies (urn-based and myopic Bayesian) than in the non-adaptive strategies (block and random; Table S1). The two non-adaptive allocation strategies performed almost identically: for each parameter set, their results differed by less than 1 percentage point. The two adaptive strategies performed similarly: for half of the parameter sets, their results differed by less than 2 percentage points. In the remaining parameter sets, their results varied by between 2 and 9 percentage points.

When efficacious donors are common ( $f_{\text{eff}} = 0.9$ ), the adaptive and non-adaptive strategies performed similarly (Fig. 3). In other cases, the performance of the two strategies differed substantially. For example, for the parameterization most similar to the one in Table 1, the random strategy allocated 15% of patients to efficacious donors while the myopic Bayesian strategy allocated 41% of patients to efficacious donors.

### **Trials using adaptive allocation have higher statistical power**

Because trials that used the adaptive donor allocation strategies allocated more patients to efficacious donors than the trials that used the non-adaptive strategies, we expected that trials using adaptive strategies would



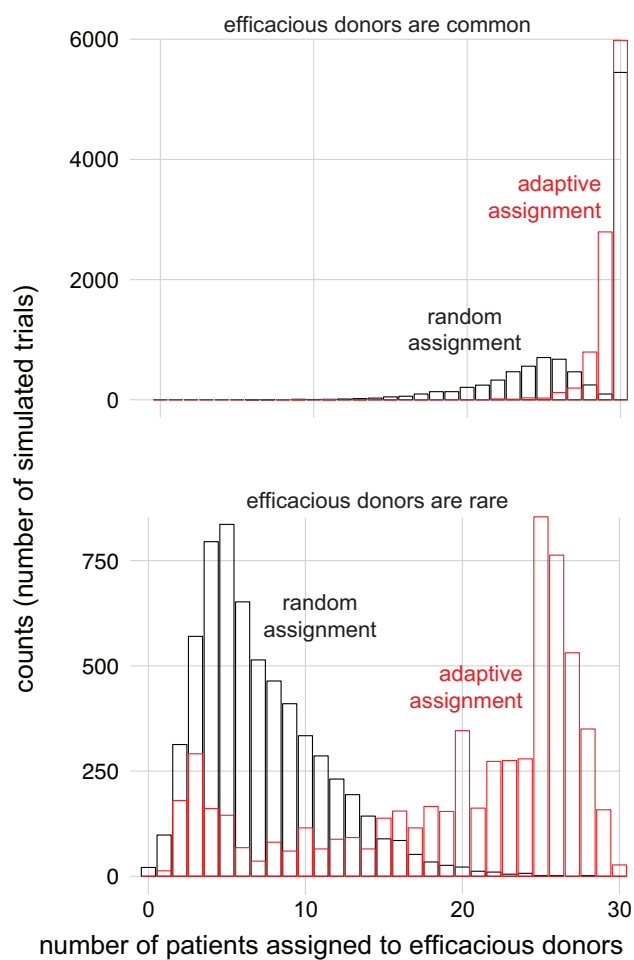

Figure 3: Adaptive strategy allocates more patients to efficacious donors. (top) For the parameterization most similar to the one in Table 1 (top), the adaptive strategy (red) allocated more patients to efficacious donors than random allocation (black) did. When efficacious donors are common (bottom; same parameters as top but with  $f_{\text{eff}} = 0.9$ ), the two strategies allocate similar numbers of patients to efficacious donors. For visual clarity, only trials in which there was at least one efficacious donor are shown.

| Trial parameters     |                  |                  |                       | FMT power (%) |        |      |          | Naive power (%) |      |      |
|----------------------|------------------|------------------|-----------------------|---------------|--------|------|----------|-----------------|------|------|
| $p_{\text{placebo}}$ | $p_{\text{eff}}$ | $f_{\text{eff}}$ | $N_{\text{patients}}$ | block         | random | urn  | Bayesian |                 |      |      |
| 0.05                 | 0.4              | 0.15             | 15                    | 4.57          | 5.04   | 17.2 | 19.1     | 68.1            |      |      |
|                      |                  |                  | 30                    | 8.44          | 8.89   | 33.7 | 39.4     | 93.8            |      |      |
|                      |                  |                  | 60                    | 23            | 24.1   | 53.5 | 58       | 100             |      |      |
|                      |                  | 0.9              | 0.15                  | 15            | 59.1   | 59.7 | 63.4     | 64.3            | 67.8 |      |
|                      |                  |                  |                       | 30            | 87.7   | 87.4 | 92.1     | 93.2            | 94.2 |      |
|                      |                  |                  |                       | 60            | 99.2   | 99.1 | 99.8     | 99.9            | 100  |      |
|                      |                  | 0.95             | 0.15                  | 15            | 19.9   | 21.3 | 60.3     | 60.7            | 100  |      |
|                      |                  |                  |                       | 30            | 33.9   | 34.2 | 61.4     | 61.6            | 100  |      |
|                      |                  |                  |                       | 60            | 55.9   | 53.2 | 63.2     | 63.1            | 100  |      |
|                      |                  |                  | 0.9                   | 0.15          | 15     | 99.8 | 99.5     | 100             | 100  | 100  |
|                      |                  |                  |                       |               | 30     | 100  | 100      | 100             | 100  | 100  |
|                      |                  |                  |                       |               | 60     | 100  | 100      | 100             | 100  | 100  |
| 0.25                 | 0.4              | 0.15             | 15                    | 2.8           | 2.88   | 3.43 | 3.77     | 11.4            |      |      |
|                      |                  |                  | 30                    | 4.44          | 4.55   | 7.16 | 7.27     | 25.5            |      |      |
|                      |                  |                  | 60                    | 6.55          | 6.15   | 13.6 | 13.9     | 47.3            |      |      |
|                      |                  | 0.9              | 0.15                  | 15            | 10.5   | 10.3 | 10.5     | 10.7            | 11.7 |      |
|                      |                  |                  |                       | 30            | 21.6   | 21.3 | 23       | 23              | 25   |      |
|                      |                  |                  |                       | 60            | 40.7   | 40.7 | 44.5     | 44.8            | 47.2 |      |
|                      |                  | 0.95             | 0.15                  | 15            | 9.04   | 10.3 | 38.6     | 47.4            | 99.4 |      |
|                      |                  |                  |                       | 30            | 20     | 20.3 | 60       | 60.1            | 100  |      |
|                      |                  |                  |                       | 60            | 32.6   | 32.7 | 63.4     | 62.7            | 100  |      |
|                      |                  |                  | 0.9                   | 0.15          | 15     | 94.3 | 93.9     | 98.2            | 99   | 99.6 |
|                      |                  |                  |                       |               | 30     | 99.6 | 99.4     | 100             | 100  | 100  |
|                      |                  |                  |                       |               | 60     | 100  | 100      | 100             | 100  | 100  |

Table 2: Adaptive strategies yield clinical trials with higher statistical power. “FMT power” is the power computed by simulating the results of trials that would occur if the frequency of efficacious donors is  $f_{\text{eff}}$ . “Naive power” is the power computed in the situation in which all donors are efficacious (i.e.,  $f_{\text{eff}} = 1.0$ ). All 95% confidence intervals on these values are within 1 percentage point of the reported value and are not shown.

have greater statistical power. 167

The adaptive strategies consistently yielded higher statistical powers than the non-adaptive strategies (Table 2). When efficacious donors are rare, the performance gap is larger. For example, for the parameterization most similar to the one in Table 1, a trial that uses random allocation is expected to have 9% power, while the myopic Bayesian strategy can deliver 39% power. The gap in performance is smallest when selecting a donor at random is likely to yield an efficacious donor: among the trials with  $f_{\text{eff}} = 0.9$ , the adaptive and non-adaptive statistical powers differed by less than 6 percentage points. 168  
169  
170  
171  
172  
173

Low statistical powers when  $f_{\text{eff}}$  is small are likely due to the fact that if *all* the available donors are not efficacious, then no allocation strategy should make a trial achieve significance. For example, if only 15% of donors are efficacious ( $f_{\text{eff}} = 0.15$ ) and there are only 6 donors (the number used in these simulations), 174  
175  
176

then we expect that 38% of trials will have no good donors (using the binomial distribution function). We therefore separately analyzed the simulated trials in which no donors were efficacious and the simulated trials in which at least one donor was efficacious (Table S2). When no donors are efficacious, trials with adaptive or non-adaptive strategies have  $\sim 0\%$  power. Among trials with at least one efficacious donor, the difference in statistical power between adaptive and non-adaptive strategies is greater than the difference computed using the results of all trials.

Conversely, the power computed in traditional calculations that do not account for differences in donor efficacy (i.e., that assume that all donors are efficacious, or equivalently  $f_{\text{eff}} = 1.0$ ) is, in many cases, substantially higher than the power computed when accounting for differences in donor efficacy (Table 2, column “Naive powers”). For example, for the parameter set most similar to the one in Table 1, the naive calculation predicts 94% power, but the calculation that accounts for differences in donor efficacy predicts only 9% power for non-adaptive allocation strategies. The differences between the powers computed by the naive method and our approach is largest when  $f_{\text{eff}}$  is small.

## Performance of adaptive strategies depend on their parameterization

In these simulations, we varied the actual values of  $p_{\text{placebo}}$  and  $p_{\text{eff}}$  but we always initialized the adaptive algorithms the same ways. To determine the sensitivity of the adaptive allocation algorithms’ performance to their initialization, we simulated trials in which the actual model parameters were fixed but the algorithms’ initializations varied (Table S3 and Table S4). The myopic Bayesian algorithm’s performance was mostly robust to the parameterization of its prior distribution except when the prior was strong and inaccurate. Accurate priors, weak priors, and uniform priors provide comparable performance. In contrast, the urn algorithm delivered widely varying powers, from 15% to 40%, depending on its parameterization.

## Increasing the number of available donors benefits the adaptive Bayesian strategy

Increasing the number of available donors increases the probability that at least one of them will be efficacious. We therefore determined, for each donor allocation strategy, the number of available donors that optimized the trial’s expected power. Simulations showed that increasing the size of the donor “pool” almost always increased the power of trials using the myopic Bayesian donor allocation but, depending on the parameter set, could increase or decrease the power of trials using other allocation strategies (Table S5).

Table 3 shows how donor selection strategy and model parameter values affects the optimal number of donors. Notably, when efficacious donors are uncommon ( $f_{\text{eff}} = 0.15$ ) and only moderately efficacious

| Trial parameters |                  |                      | Optimal $N_{\text{donors}}$ |       |       |          |
|------------------|------------------|----------------------|-----------------------------|-------|-------|----------|
| $f_{\text{eff}}$ | $p_{\text{eff}}$ | $p_{\text{placebo}}$ | random                      | block | urn   | Bayesian |
| 0.15             | 0.4              | 0.05                 | 1                           | 1     | 10    | 10–30    |
| 0.15             | 0.4              | 0.25                 | 1                           | 1     | 5     | 10       |
| 0.15             | 0.95             | 0.05                 | 3–15                        | 3–5   | 15–30 | 15–30    |
| 0.15             | 0.95             | 0.25                 | 3                           | 3     | 10    | 10–30    |
| 0.9              | 0.4              | 0.05                 | 1–30                        | 3–30  | 3–30  | 3–30     |
| 0.9              | 0.4              | 0.25                 | 1–30                        | 1–30  | 1–30  | 5–30     |
| 0.9              | 0.95             | 0.05                 | 3–30                        | 3–30  | 3–30  | 3–30     |
| 0.9              | 0.95             | 0.25                 | 3–30                        | 3–30  | 3–30  | 3–30     |

Table 3: The optimal number of donors varies by donor selection strategy and model parameter values. For each parameter value, trials were simulated using 1, 3, 5, 10, 15, and 30 donors. (The number of patients was fixed at 30.) The number of donors that optimized the expected power was identified. If multiple numbers of donors yielded powers within 0.05 of the optimal value, all those numbers are reported as a range.

( $p_{\text{eff}} = 0.4$ ), the non-adaptive strategies perform optimally when only one donor is used. In other words, when using non-adaptive strategies in this parameter regime, it is wiser to take the 15% chance of picking a single efficacious donor than it is to distribute patients across many donors, allotting around 15% of them to efficacious donors. In contrast, the myopic Bayesian donor allocation almost always benefits from a larger donor pool.

## Discussion

### Model limitations

We chose to use a simple model for a simple use case because, in the absence of data about the treatment histories of hundreds of patients using dozens of donors, we do not believe that more complicated models will be more useful to aiding trial design. The model’s greatest weakness is that it cannot be validated, but it is exactly the model’s purpose to improve the probability of collecting the kind of information that could validate or invalidate it. In light of the dearth of data, we developed a simple model, and it could be that the simplifications we made limit the model’s validity. For example, the model assumes that each donor produces efficacious stool or inefficacious stool (when in fact there is probably day-to-day and donor-to-donor variation in stool efficacy) and that all patients receive one course of treatment (while, say, patients who do not respond to a first treatment might be treated with stool from a different donor).

In our simulations, we assumed that the outcome from all the previous patients treatments are known before the donor for the next patient is selected. In reality, patients in an FMT trial overlap. The urn-based

method can still be used for overlapping patients [18], but the myopic Bayesian method would require some 224  
modification. For example, clinicians could choose to consult the myopic Bayesian’s rankings of donors inter- 225  
mittently, or patients could be allocated in proportion to the predicted probabilities of successful treatments. 226

## **Differences in donor efficacy should be accounted for in trial design** 227

Our results entail recommendations to clinicians. First, the powers we computed here are, in many cases, 228  
well below the powers computed assuming that all donors are efficacious. We therefore encourage researchers 229  
to consult our predictions about statistical power when deciding on the size of their trials. 230

Second, a high placebo rate can substantially decrease the statistical power of an FMT trial. We therefore 231  
encourage researchers to use the most stringent outcome measurement possible (e.g., an endoscopic Mayo 232  
score for inflammatory bowel disease). 233

Third, adaptive donor allocation strategies consistently delivered higher statistical power than traditional, 234  
non-adaptive approaches. We therefore recommend that researchers use such an adaptive strategy. The urn- 235  
based strategy has the advantages that similar response-adaptive strategies may be familiar to clinicians, 236  
it is randomized, and it is simple to implement. However, an urn-based strategy needs to be carefully 237  
parameterized: a badly-parameterized urn-based strategy performs similarly to random allocation. The 238  
adaptive Bayesian donor allocation algorithm performs well even when using the “default” settings (a uniform 239  
prior) but is complex and deterministic. To fully leverage this strategy, a clinician would need to consult the 240  
algorithm’s output after every patient outcome and follow the algorithm’s deterministic instructions, which 241  
might introduce bias. 242

Fourth, adaptive algorithms benefit from having access to a “bank” of 10 or more donors. Researchers 243  
hoping to achieve the full benefits of adaptive donor selection must be prepared to change donors multiple 244  
times during the trial. 245

Finally, researchers reporting about FMT trials should include information about the donors, notably 246  
how many donors were used and what proportion of patients allotted to each donor responded to treatment. 247  
This information will help future researchers account for differences in donor efficacy. 248

## **Future research may identify mechanistic explanations of FMT’s efficacy** 249

The adaptive allocation strategies we described here have a narrow aim: to increase the number of successful 250  
patient outcomes in a trial. In theory, an adaptive trial design is capable of more. For example, if it were 251  
hypothesized that FMT succeeded or failed because of the presence or absence of some particular microbial 252

species in the donor’s stool, then an adaptive trial design could recommend donor choices that aim to identify  
that critical species.

We did not pursue a hypothesis-centric approach because we believe it is premature. Even the mechanism  
by which FMT treats *C. difficile*, the most well-studied case, remains unclear. We expect that strong  
hypotheses about mechanism will come from retroactive comparison of efficacious vs. inefficacious stool  
*after* clinical trials have definitively show that FMT is effective for treating some disease. Our study aims  
to do exactly this. Until then, we hope that our results about adaptive donor allocation help more patients  
benefit from FMT and will help clinicians identify those conditions that FMT can treat.

## Acknowledgments

This material is based on work supported by the National Science Foundation Graduate Research Fellowship  
under Grant No. 1122374 and by the Center for Microbiome Informatics and Therapeutics at MIT.

## References

- [1] Cohen SH, Gerding DN, Johnson S, Kelly CP, Loo VG, McDonald LC, et al. Clinical Practice Guide-  
lines for *Clostridium difficile* Infection in Adults. *Infect Control Hosp Epidemiol.* 2010;31(5):431–455.  
doi:10.1086/651706.
- [2] van Nood E, Vrieze A, Nieuwdorp M, Fuentes S, Zoetendal EG, de Vos WM, et al. Duodenal  
Infusion of Donor Feces for Recurrent *Clostridium difficile*. *N Engl J Med.* 2013;368(5):407–415.  
doi:10.1056/NEJMoa1205037.
- [3] Kelly CP, LaMont JT. *Clostridium difficile* – More Difficult Than Ever. *N Engl J Med.*  
2008;359(18):1932–1940. doi:10.1056/NEJMra0707500.
- [4] Alang N, Kelly CR. Weight Gain After Fecal Microbiota Transplantation. *Open Forum Infect Dis.*  
2015;2(1). doi:10.1093/ofid/ofv004.
- [5] Li SS, Zhu A, Benes V, Costea PI, Hercog R, Hildebrand F, et al. Durable coexistence of  
donor and recipient strains after fecal microbiota transplantation. *Science.* 2016;352(6285):586–589.  
doi:10.1126/science.aad8852.

- [6] Kassam Z, Lee CH, Yuan Y, Hunt RH. Fecal Microbiota Transplantation for *Clostridium difficile* Infection: Systematic Review and Meta-Analysis. *Am J Gastroenterol.* 2013;108(4):500–508. doi:10.1038/ajg.2013.59. 278 279 280
- [7] Khoruts A, Sadowsky MJ. Understanding the mechanisms of faecal microbiota transplantation. *Nat Rev Gastroenterol Hepatol.* 2016;doi:10.1038/nrgastro.2016.98. 281 282
- [8] Smits LP, Bouter KEC, de Vos WM, Borody TJ, Nieuwdorp M. Therapeutic Potential of Fecal Microbiota Transplantation. *Gastroenterology.* 2013;145(5):946–953. doi:10.1053/j.gastro.2013.08.058. 283 284
- [9] Sadowsky MJ, Khoruts A. Faecal microbiota transplantation is promising but not a panacea. *Nat Microbiol.* 2016;1. doi:10.1038/nmicrobiol.2016.15. 285 286
- [10] Moayyedi P, Surette MG, Kim PT, Libertucci J, Wolfe M, Onischi C, et al. Fecal Microbiota Transplantation Induces Remission in Patients With Active Ulcerative Colitis in a Randomized Controlled Trial. *Gastroenterology.* 2015;149(1):102–109.e6. doi:10.1053/j.gastro.2015.04.001. 287 288 289
- [11] Cook TD, DeMets DL. *Introduction to Statistical Methods for Clinical Trials.* Chapman & Hall/CRC; 2008. 290 291
- [12] Bartlett RH, Roloff DW, Cornell RG, Andrews AF, Dillon PW, Zwischenberger JB. Extracorporeal Circulation in Neonatal Respiratory Failure: A Prospective Randomized Study. *Pediatrics.* 1985;76(4):479–487. 292 293 294
- [13] Chow SC, Chang M. *Adaptive Methods in Clinical Trials.* Chapman & Hall/CRC; 2007. 295
- [14] Hung JHM, O’Neill RT, Wang SJ, Lawrence J. A Regulatory View of Adaptive/Flexible Clinical Trial Design. *Biom J.* 2006;48(4):565–573. doi:10.1002/bimj.200610229. 296 297
- [15] Wei LJ, Smythe RT, Lin DY, Park TS. Statistical Inference with Data-Dependent Treatment Allocation Rules. *J Am Stat Assoc.* 1990;85(409):156–162. doi:10.1080/01621459.1990.10475319. 298 299
- [16] Wei LJ, Durham S. The Randomized Play-the-Winner Rule in Medical Trials. *J Am Stat Assoc.* 1978;73(364):840–843. doi:10.1080/01621459.1978.10480109. 300 301
- [17] Zelen M. Play the Winner Rule and the Controlled Clinical Trial. *J Am Stat Assoc.* 1969;64(325):131–146. doi:10.1080/01621459.1969.10500959. 302 303
- [18] Wei LJ. The Generalized Polya’s Urn Design for Sequential Medical Trials. *Ann Stat.* 1979;7(2):291–296. 304

- [19] Berry DA, Fristedt B. Bandit Problems: Sequential Allocation of Experiments. Springer Netherlands; 1985. 305  
306
- [20] Hahn T. Cuba – a library for multidimensional numerical integration. Comput Phys Commun. 2005;168(2):78–95. doi:10.1016/j.cpc.2005.01.010. 307  
308
- [21] Tange O. GNU Parallel – The Command-Line Power Tool. ;login: The USENIX Magazine. 2011;36(1):42–47. doi:10.5281/zenodo.16303. 309  
310
- [22] Rossen NG, Fuentes S, van der Spek MJ, Tijssen JG, Hartman JHA, Dufflou A, et al. Findings From a Randomized Controlled Trial of Fecal Transplantation for Patients With Ulcerative Colitis. Gastroenterology. 2015;149(1):110–118. doi:10.1053/j.gastro.2015.03.045. 311  
312  
313
- [23] Su C, Lichtenstein GR, Krok K, Brensinger CM, Lewis JD. A meta-analysis of the placebo rates of remission and response in clinical trials of active Crohn’s disease. Gastroenterology. 2004;126(5):1257– 314  
315  
1269. doi:10.1053/j.gastro.2004.01.024. 316
- [24] Su C, Lewis JD, Goldberg B, Brensinger C, Lichtenstein GR. A Meta-Analysis of the Placebo Rates of Remission and Response in Clinical Trials of Active Ulcerative Colitis. Gastroenterology. 2007;132(2):516–526. doi:10.1053/j.gastro.2006.12.037. 317  
318  
319
- [25] Clopper CJ, Pearson ES. The use of confidence or fiducial limits illustrated in the case of the binomial. Biometrika. 1934;26(4):404–413. doi:10.1093/biomet/26.4.404. 320  
321



## Supplementary Tables

| $p_{\text{placebo}}$ | $p_{\text{eff}}$ | $f_{\text{eff}}$ | $N_{\text{patients}}$ | block |      | random |      | urn  |       | Bayesian |        |
|----------------------|------------------|------------------|-----------------------|-------|------|--------|------|------|-------|----------|--------|
|                      |                  |                  |                       | mean  | s.d. | mean   | s.d. | mean | s.d.  | mean     | s.d.   |
| 0.05                 | 0.4              | 0.15             | 15                    | 0.15  | 0.15 | 0.15   | 0.17 | 0.29 | 0.30  | 0.32     | 0.33   |
|                      |                  |                  | 30                    | 0.15  | 0.14 | 0.15   | 0.16 | 0.36 | 0.35  | 0.41     | 0.38   |
|                      |                  |                  | 60                    | 0.15  | 0.14 | 0.15   | 0.15 | 0.44 | 0.39  | 0.49     | 0.42   |
|                      |                  | 0.9              | 15                    | 0.9   | 0.12 | 0.9    | 0.14 | 0.95 | 0.075 | 0.96     | 0.068  |
|                      |                  |                  | 30                    | 0.9   | 0.12 | 0.9    | 0.13 | 0.97 | 0.051 | 0.98     | 0.041  |
|                      |                  |                  | 60                    | 0.9   | 0.12 | 0.9    | 0.13 | 0.98 | 0.03  | 0.99     | 0.022  |
|                      | 0.95             | 0.15             | 15                    | 0.15  | 0.15 | 0.15   | 0.17 | 0.44 | 0.36  | 0.51     | 0.42   |
|                      |                  |                  | 30                    | 0.15  | 0.15 | 0.15   | 0.16 | 0.52 | 0.42  | 0.56     | 0.45   |
|                      |                  |                  | 60                    | 0.15  | 0.15 | 0.15   | 0.15 | 0.57 | 0.45  | 0.6      | 0.47   |
|                      |                  | 0.9              | 15                    | 0.9   | 0.13 | 0.9    | 0.14 | 0.97 | 0.047 | 0.99     | 0.028  |
|                      |                  |                  | 30                    | 0.9   | 0.12 | 0.9    | 0.13 | 0.98 | 0.027 | 1.0      | 0.013  |
|                      |                  |                  | 60                    | 0.9   | 0.12 | 0.9    | 0.13 | 0.99 | 0.014 | 1.0      | 0.0069 |
| 0.25                 | 0.4              | 0.15             | 15                    | 0.15  | 0.15 | 0.15   | 0.17 | 0.20 | 0.25  | 0.21     | 0.29   |
|                      |                  |                  | 30                    | 0.15  | 0.15 | 0.15   | 0.16 | 0.24 | 0.30  | 0.24     | 0.34   |
|                      |                  |                  | 60                    | 0.15  | 0.15 | 0.15   | 0.15 | 0.29 | 0.34  | 0.28     | 0.38   |
|                      |                  | 0.9              | 15                    | 0.9   | 0.13 | 0.9    | 0.14 | 0.93 | 0.14  | 0.94     | 0.15   |
|                      |                  |                  | 30                    | 0.9   | 0.12 | 0.9    | 0.13 | 0.94 | 0.13  | 0.95     | 0.14   |
|                      |                  |                  | 60                    | 0.9   | 0.12 | 0.9    | 0.13 | 0.96 | 0.11  | 0.96     | 0.14   |
|                      | 0.95             | 0.15             | 15                    | 0.15  | 0.15 | 0.15   | 0.17 | 0.36 | 0.34  | 0.45     | 0.42   |
|                      |                  |                  | 30                    | 0.15  | 0.15 | 0.15   | 0.16 | 0.45 | 0.38  | 0.52     | 0.44   |
|                      |                  |                  | 60                    | 0.15  | 0.15 | 0.15   | 0.15 | 0.53 | 0.42  | 0.57     | 0.46   |
|                      |                  | 0.9              | 15                    | 0.9   | 0.13 | 0.9    | 0.14 | 0.96 | 0.076 | 0.99     | 0.056  |
|                      |                  |                  | 30                    | 0.9   | 0.12 | 0.9    | 0.13 | 0.98 | 0.048 | 0.99     | 0.029  |
|                      |                  |                  | 60                    | 0.9   | 0.12 | 0.9    | 0.13 | 0.99 | 0.029 | 1.0      | 0.016  |

Table S1: Fraction of patients allocated to efficacious donors. The same simulated trials were analyzed to create Table 2 and this table.

| Parameters       |                  | Simulation conditions   |                          | Power (%) |       |      |          |
|------------------|------------------|-------------------------|--------------------------|-----------|-------|------|----------|
| $p_{\text{eff}}$ | $f_{\text{eff}}$ | Donor pool quality      | $N_{\text{simulations}}$ | random    | block | urn  | Bayesian |
| 0.4              | 0.15             | all trials              | 10000                    | 8.9       | 8.4   | 34   | 39       |
| 0.4              | 0.15             | no efficacious donors   | 3794                     | 0.37      | 0.29  | 0.4  | 0.16     |
| 0.4              | 0.15             | some efficacious donors | 6206                     | 14        | 13    | 54   | 63       |
| 0.4              | 0.9              | some efficacious donors | 10000                    | 87        | 88    | 92   | 93       |
| 0.95             | 0.15             | all trials              | 10000                    | 34        | 34    | 61   | 62       |
| 0.95             | 0.15             | no efficacious donors   | 3851                     | 0.62      | 0.44  | 0.34 | 0.31     |
| 0.95             | 0.15             | some efficacious donors | 6149                     | 55        | 55    | 100  | 100      |
| 0.95             | 0.9              | some efficacious donors | 10000                    | 100       | 100   | 100  | 100      |

Table S2: Power of simulated clinical trials, conditioned on presence of efficacious donors. A subset of the data used to create Table 2 (only those simulations with  $N_{\text{patients}} = 30$  and  $p_{\text{placebo}} = 0.05$ ) was analyzed by separately estimating the power for the trials in which no donors were efficacious (“no efficacious donors”) and in which at least one donor was efficacious (“some efficacious donors”). “All simulations” shows the same data as in Table 2. For  $f_{\text{eff}} = 0.9$ , none of the 10,000 simulations had a donor pool with no efficacious donors. All 95% confidence intervals are within 1 percentage point of the reported value and are not shown.

| Hyperparameterization | Hyperparameter values |                      |                   |                   |                   |                   | Power (%) |
|-----------------------|-----------------------|----------------------|-------------------|-------------------|-------------------|-------------------|-----------|
|                       | $A_{\text{placebo}}$  | $B_{\text{placebo}}$ | $A_{\text{peff}}$ | $B_{\text{peff}}$ | $A_{\text{feff}}$ | $B_{\text{feff}}$ |           |
| From Table 1          | 2                     | 35                   | 7                 | 11                | 1                 | 5                 | 41.1      |
| Weak, accurate        | 0.2                   | 3.5                  | 0.7               | 1.1               | 0.1               | 0.5               | 41.2      |
| Strong, accurate      | 20                    | 350                  | 70                | 110               | 10                | 50                | 40.4      |
| Weak, inaccurate      | 0.4                   | 3.3                  | 1.4               | 0.4               | 0.2               | 0.4               | 40.9      |
| Strong, inaccurate    | 40                    | 330                  | 140               | 40                | 20                | 40                | 34.4      |
| Uniform               | n.a.                  | n.a.                 | n.a.              | n.a.              | n.a.              | n.a.              | 39.6      |

Table S3: Sensitivity of simulated clinical trial power to parameterization of the myopic Bayesian algorithm parameters. Starting from the parameter described in Table 1, 10,000 trials using the myopic Bayesian donor allocation were simulated for each of six different parameterizations of the Bayesian algorithm. “Accurate” means that the prior is centered around the true value (i.e., that  $\frac{A}{A+B}$  equals the true value); “inaccurate” means that the prior is centered at approximately double the true value (but that  $A + B$  has been held constant). “Strong” means that every hyperparameter is ten-fold greater; “weak” means that every hyperparameter is ten-fold smaller. “Uniform” means a uniform prior was used for all parameters. All 95% confidence intervals are within 1 percentage point of the reported value and are not shown.

| $w$ | $\alpha$ | $\beta$ | replace? | Power (%) |
|-----|----------|---------|----------|-----------|
| 1   | 3        | 0       | true     | 28.5      |
|     |          |         | false    | 35.6      |
|     |          | 1       | true     | 13.9      |
|     | 6        | 0       | false    | 14.2      |
|     |          |         | true     | 33.2      |
|     |          | 1       | true     | 16.2      |
| 3   | 3        | 0       | false    | 16.4      |
|     |          |         | true     | 19.7      |
|     |          | 1       | true     | 13.2      |
|     | 6        | 0       | false    | 13.1      |
|     |          |         | true     | 24.8      |
|     |          | 1       | true     | 15.6      |
|     |          | 0       | false    | 32.6      |
|     |          |         | true     | 15.3      |

Table S4: Sensitivity of simulated clinical trial power to urn parameterization. Using the parameter set described in Table 1, 10,000 trials using the urn-based donor allocation were simulated for each of several combinations of the parameters for the urn model as described in [18]. We also vary whether drawn balls are replaced or not. All 95% confidence intervals are within 1 percentage point of the reported value and are not shown.

| Parameters       |                  |                      |                     | Power (%) |       |      |          |
|------------------|------------------|----------------------|---------------------|-----------|-------|------|----------|
| $f_{\text{eff}}$ | $p_{\text{eff}}$ | $p_{\text{placebo}}$ | $N_{\text{donors}}$ | random    | block | urn  | Bayesian |
| 0.15             | 0.4              | 0.05                 | 1                   | 15.5      | 15.3  | 15.5 | 14.8     |
|                  |                  |                      | 3                   | 12.4      | 12.2  | 28.4 | 30.9     |
|                  |                  |                      | 5                   | 9.87      | 9.67  | 33.8 | 38       |
|                  |                  |                      | 10                  | 7.49      | 6.93  | 38.2 | 44.3     |
|                  |                  |                      | 15                  | 6.91      | 6.38  | 34.6 | 45.9     |
|                  |                  |                      | 30                  | 6.17      | 5.26  | 16.6 | 45.9     |
|                  |                  | 0.25                 | 1                   | 6.08      | 6.15  | 5.89 | 5.58     |
|                  |                  |                      | 3                   | 4.64      | 4.21  | 6.7  | 6.89     |
|                  |                  |                      | 5                   | 4.65      | 4.7   | 7.28 | 7.1      |
|                  |                  |                      | 10                  | 4.37      | 4.18  | 6.2  | 7.52     |
|                  |                  |                      | 15                  | 4.48      | 4.09  | 5.41 | 7.07     |
|                  |                  |                      | 30                  | 4.25      | 4.3   | 4.67 | 6.89     |
|                  | 0.95             | 0.05                 | 1                   | 15.2      | 15.1  | 15   | 14.9     |
|                  |                  |                      | 3                   | 34.4      | 37.2  | 39   | 39.2     |
|                  |                  |                      | 5                   | 35        | 36.1  | 56.3 | 56.5     |
|                  |                  |                      | 10                  | 33.7      | 33.3  | 80.1 | 80.4     |
|                  |                  |                      | 15                  | 33.5      | 32.6  | 91   | 90.6     |
|                  |                  |                      | 30                  | 31.6      | 30.4  | 87.4 | 93.9     |
|                  |                  | 0.25                 | 1                   | 17.1      | 17.3  | 17   | 16.8     |
|                  |                  |                      | 3                   | 23.1      | 22.6  | 39   | 39.9     |
|                  |                  |                      | 5                   | 21.3      | 20.9  | 55.2 | 55.5     |
|                  |                  |                      | 10                  | 18.8      | 17.7  | 69.7 | 69.7     |
|                  |                  |                      | 15                  | 17.4      | 16.8  | 65.4 | 69.9     |
|                  |                  |                      | 30                  | 16.4      | 15.4  | 43.2 | 69.4     |
| 0.9              | 0.4              | 0.05                 | 1                   | 84.9      | 84.7  | 84.6 | 84.3     |
|                  |                  |                      | 3                   | 85.9      | 85.8  | 91.8 | 92.4     |
|                  |                  |                      | 5                   | 87.4      | 87.2  | 92.4 | 92.4     |
|                  |                  |                      | 10                  | 88.4      | 88.9  | 92.3 | 92.8     |
|                  |                  |                      | 15                  | 88        | 89    | 91.8 | 92.9     |
|                  |                  |                      | 30                  | 89.1      | 89.3  | 91.1 | 92.9     |
|                  |                  | 0.25                 | 1                   | 22        | 22.3  | 22.5 | 22.1     |
|                  |                  |                      | 3                   | 21.8      | 21.2  | 23.1 | 22.7     |
|                  |                  |                      | 5                   | 21.7      | 21.3  | 23.1 | 23.2     |
|                  |                  |                      | 10                  | 21.7      | 21.3  | 22.7 | 23.7     |
|                  |                  |                      | 15                  | 22.2      | 21.5  | 22.5 | 24       |
|                  |                  |                      | 30                  | 21.9      | 21.6  | 22.1 | 23.5     |
|                  | 0.95             | 0.05                 | 1                   | 90.1      | 90.1  | 90.1 | 90.4     |
|                  |                  |                      | 3                   | 99.5      | 99.7  | 99.9 | 99.9     |
|                  |                  |                      | 5                   | 100       | 100   | 100  | 100      |
|                  |                  |                      | 10                  | 100       | 100   | 100  | 100      |
|                  |                  |                      | 15                  | 100       | 100   | 100  | 100      |
|                  |                  |                      | 30                  | 100       | 100   | 100  | 100      |
|                  |                  | 0.25                 | 1                   | 90.4      | 90.4  | 90.4 | 90.5     |
|                  |                  |                      | 3                   | 97.7      | 98.1  | 99.9 | 99.9     |
|                  |                  |                      | 5                   | 99.1      | 99.4  | 100  | 100      |
|                  |                  |                      | 10                  | 99.8      | 99.9  | 100  | 100      |
|                  |                  |                      | 15                  | 99.8      | 99.9  | 100  | 100      |
|                  |                  |                      | 30                  | 99.9      | 100   | 100  | 100      |

Table S5: Dependence of simulated clinical trial power on number of available donors. For each parameter value, trials were simulated using 1, 3, 5, 10, 15, and 30 donors. The number of patients was fixed at 30. All 95% confidence intervals are within 1 percentage point of the reported value and are not shown.
